# Supplementary material
Source: PubMed Central journal article supplement (PMC2527694)
Supplement: NIHMS60157-supplement-SI.pdf [file NIHMS60157-supplement-SI.pdf]

## Supplemental Coordinates

*ts for alpha glucose with water bridging O5 and O1*

E(RBPW91) = -763.307605474 Hartrees

| Atomic numbers |   |   | I | N= | 27 |   |
|----------------|---|---|---|----|----|---|
| 6              | 6 | 6 | 6 | 6  | 6  | 6 |
| 8              | 8 | 8 | 8 | 8  | 8  | 8 |
| 1              | 1 | 1 | 1 | 1  | 1  | 1 |
| 1              | 1 | 1 | 1 | 1  | 1  | 1 |
| 8              | 1 | 1 |   |    |    |   |

  

| Current cartesian coordinates |                 |                 | R               | N=              | 81 |  |
|-------------------------------|-----------------|-----------------|-----------------|-----------------|----|--|
| 2.35815333E+00                | 2.31277176E+00  | 7.27185518E-01  | 3.40890869E+00  | -3.57700236E-01 |    |  |
| 9.92248247E-01                | 1.81572442E+00  | -2.26495681E+00 | -4.65612875E-01 | -8.84542824E-01 |    |  |
| -2.31829047E+00               | 4.95327526E-01  | -2.13044250E+00 | 2.47753368E-01  | 1.04428302E-01  |    |  |
| -4.89010552E+00               | 3.01271601E-01  | 9.77606898E-01  | 2.51878452E+00  | 3.24012483E+00  |    |  |
| -1.53848421E+00               | 5.92143359E+00  | -3.91304607E-01 | 6.31305615E-02  | 2.80384176E+00  |    |  |
| -4.73342158E+00               | -1.86278689E-01 | -2.32494492E+00 | -4.15773178E+00 | -8.14361306E-01 |    |  |
| -7.23230137E-01               | 2.07628331E+00  | 1.54504880E+00  | -6.47946159E+00 | -9.92454334E-01 |    |  |
| -7.09484438E-01               | 2.83848495E+00  | 3.55859316E+00  | 2.32762575E+00  | 3.48780666E+00  |    |  |
| -9.17371852E-01               | 2.98382926E+00  | 1.79235690E+00  | -1.70087064E+00 | -2.47010928E+00 |    |  |
| -8.60873556E-01               | -2.73477674E+00 | 2.53811615E+00  | -2.06691292E+00 | 7.34108146E-01  |    |  |
| -1.91427011E+00               | -5.54138133E+00 | 2.26692990E+00  | 1.04537159E+00  | -5.00023118E+00 |    |  |
| -4.41254801E-01               | 2.92128776E+00  | 5.88081379E+00  | 6.78733514E-01  | -1.42689829E+00 |    |  |
| 4.59718147E+00                | -4.59507097E+00 | -5.12986643E-01 | -1.29568124E+00 | -5.66654663E+00 |    |  |
| -8.76959192E-01               | -5.75578823E+00 | -2.66208327E+00 | -9.19810174E-01 | -1.21233813E+00 |    |  |
| 4.07968043E+00                | 6.86372128E-01  | -9.14409655E-01 | 6.02680410E+00  | -6.14265295E-01 |    |  |
| 8.12558840E-01                | 5.13208624E+00  | -1.39669335E+00 | -2.15827819E+00 | 6.19634871E+00  |    |  |
| -1.93442068E+00               |                 |                 |                 |                 |    |  |

*ts for beta glucose with water bridging O5 and O1*

E(RBPW91) = -763.304396431 Hartrees

| Atomic numbers |   |   | I | N= | 27 |   |
|----------------|---|---|---|----|----|---|
| 6              | 6 | 6 | 6 | 6  | 6  | 6 |
| 8              | 8 | 8 | 8 | 8  | 8  | 8 |
| 1              | 1 | 1 | 1 | 1  | 1  | 1 |
| 1              | 1 | 1 | 1 | 1  | 1  | 1 |
| 8              | 1 | 1 |   |    |    |   |

  

| Current cartesian coordinates |                 |                 | R               | N=              | 81 |  |
|-------------------------------|-----------------|-----------------|-----------------|-----------------|----|--|
| 2.94075873E+00                | 9.91036359E-01  | -6.02512239E-01 | 2.85356859E+00  | -1.68045480E+00 |    |  |
| 4.48711619E-01                | 4.66380202E-01  | -3.04008641E+00 | -3.89442027E-01 | -1.91358050E+00 |    |  |
| -1.70370652E+00               | 5.26709746E-01  | -2.00658155E+00 | 1.05046860E+00  | -3.48292199E-01 |    |  |
| -4.35393502E+00               | 2.44130302E+00  | 6.15668966E-01  | 4.76550715E+00  | 2.41826375E+00  |    |  |
| 1.27302792E-01                | 4.91927640E+00  | -3.09811517E+00 | -4.97405803E-01 | 3.45335916E-01  |    |  |
| -5.53045384E+00               | 5.83651449E-01  | -4.09160203E+00 | -2.96933409E+00 | -3.82150376E-01 |    |  |
| 2.19734904E-01                | 2.19503170E+00  | 6.54362466E-01  | -6.55957916E+00 | 1.63841652E+00  |    |  |
| -6.22332686E-01               | 2.37489005E+00  | 1.07698730E+00  | -2.62020272E+00 | 2.91202913E+00  |    |  |
| -1.54935132E+00               | 2.52278830E+00  | 4.36219416E-01  | -3.08028155E+00 | -2.47384456E+00 |    |  |
| -1.88755965E+00               | -1.70286836E+00 | 2.61034076E+00  | -2.01059601E+00 | 1.12930544E+00  |    |  |
| -2.42717244E+00               | -4.13980522E+00 | 4.46490585E+00  | 2.27939834E-01  | -4.46431025E+00 |    |  |
| 2.21395534E+00                | 2.68563964E+00  | 6.42777144E+00  | -2.15592982E+00 | -8.33529314E-02 |    |  |
| 1.93221589E+00                | -6.32896604E+00 | 1.62454558E-01  | -3.83927442E+00 | -4.74374309E+00 |    |  |
| -2.42813704E-02               | -6.58579712E+00 | -1.89706708E-01 | -5.05794988E-01 | 7.23969710E-01  |    |  |
| 4.32028846E+00                | 2.49586855E-01  | 2.16632136E+00  | 6.12367456E+00  | -2.23003428E-01 |    |  |
| 3.74601730E+00                | 4.76479624E+00  | -1.84168152E-01 | 2.33461058E+00  | 7.20937936E+00  |    |  |
| 1.23160872E+00                |                 |                 |                 |                 |    |  |

*ts for alpha glucose with water bonding OH1*

E(RBPW91) = -763.229409124 Hartrees

| Atomic numbers |   |   | I | N= | 27 |   |
|----------------|---|---|---|----|----|---|
| 6              | 6 | 6 | 6 | 6  | 6  | 6 |
| 8              | 8 | 8 | 8 | 8  | 8  | 8 |
| 8              | 1 | 1 | 1 | 1  | 1  | 1 |
| 1              | 1 | 1 | 1 | 1  | 1  | 1 |
| 1              | 1 | 1 |   |    |    |   |

  

| Current cartesian coordinates |                 |                 | R               | N=              | 81 |  |
|-------------------------------|-----------------|-----------------|-----------------|-----------------|----|--|
| 1.99696188E+00                | -8.05668257E-01 | -1.39744806E+00 | 1.19546343E+00  | 1.97203569E+00  |    |  |
| -1.75704580E+00               | -4.30956052E-01 | 2.73093022E+00  | 4.77442903E-01  | -2.72323479E+00 |    |  |
| 1.01039863E+00                | 7.07659909E-01  | -1.92174509E+00 | -1.77388019E+00 | 7.01062163E-01  |    |  |
| -4.15942462E+00               | -3.56346371E+00 | 4.22531998E-01  | 3.31827773E+00  | -1.14506425E+00 |    |  |
| 7.31921244E-01                | 3.37850185E+00  | 3.51259517E+00  | -1.93934049E+00 | -1.15496758E+00 |    |  |
| 5.29905519E+00                | 1.70051657E-01  | -4.16229618E+00 | 1.67619516E+00  | 2.89205806E+00  |    |  |
| -3.44461515E-01               | -2.26914163E+00 | -1.41331675E+00 | -5.28260726E+00 | -3.32809012E+00 |    |  |
| -1.98660203E+00               | 8.09459535E+00  | -2.76188987E+00 | 1.73169430E+00  | 2.92620967E+00  |    |  |
| -1.46673116E+00               | -3.15643743E+00 | 5.52466524E-02  | 2.11360630E+00  | -3.49588062E+00 |    |  |
| 7.47406912E-01                | 2.50314335E+00  | 2.18270893E+00  | -3.98859710E+00 | 1.33158466E+00  |    |  |
| -8.98716481E-01               | -8.92424127E-01 | -2.18678683E+00 | 2.46557795E+00  | -3.50385814E+00 |    |  |
| -5.51120715E+00               | 7.63744523E-01  | -5.59889861E+00 | -3.10473164E+00 | 1.83556184E+00  |    |  |
| 2.77029632E+00                | 5.22493715E+00  | -1.76252996E+00 | -2.47099898E+00 | 5.59040280E+00  |    |  |
| 1.40247828E+00                | -3.12282961E+00 | 1.28461406E+00  | 4.34219191E+00  | -3.86352221E+00 |    |  |
| -3.28587513E+00               | -3.14100158E+00 | 6.30085196E+00  | -3.55467362E+00 | 1.49177948E+00  |    |  |
| 9.03992471E+00                | -3.13719052E+00 | 1.93940111E-01  | 7.08246479E+00  | -1.09248391E+00 |    |  |
| 1.35963627E+00                |                 |                 |                 |                 |    |  |

*ts for beta glucose with water bonding OH1*

E(RBPW91) = -763.221200048 Hartrees

| Atomic numbers |   |   | I | N= | 27 |   |
|----------------|---|---|---|----|----|---|
| 6              | 6 | 6 | 6 | 6  | 6  | 6 |
| 8              | 8 | 8 | 8 | 8  | 8  | 8 |
| 8              | 1 | 1 | 1 | 1  | 1  | 1 |
| 1              | 1 | 1 | 1 | 1  | 1  | 1 |
| 1              | 1 | 1 |   |    |    |   |

  

| Current cartesian coordinates |                 |                 | R               | N=              | 81 |  |
|-------------------------------|-----------------|-----------------|-----------------|-----------------|----|--|
| -2.15369308E+00               | 2.70861805E-02  | -6.38925360E-01 | -9.39216557E-01 | 2.32213495E+00  |    |  |
| 6.75263717E-01                | 1.72750005E+00  | 2.72886050E+00  | -3.00818396E-01 | 3.34597837E+00  |    |  |
| 3.83773438E-01                | 3.89739050E-02  | 2.02327276E+00  | -1.90771976E+00 | -1.14162483E+00 |    |  |
| 3.32993958E+00                | -4.39350503E+00 | -4.83724036E-01 | -4.40654449E+00 | -5.13919405E-01 |    |  |
| 2.75848873E-01                | -2.43544515E+00 | 4.49232417E+00  | 2.04149101E-01  | 2.78712217E+00  |    |  |
| 4.85323841E+00                | 9.46790198E-01  | 5.81679519E+00  | 8.10989453E-01  | -9.56580266E-01 |    |  |
| -4.54884314E-01               | -2.13887603E+00 | -1.84343652E-01 | 3.04479685E+00  | -4.93774166E+00 |    |  |
| 2.11008419E+00                | -9.39960493E+00 | -1.49534598E+00 | -4.21702367E-01 | -2.06448650E+00 |    |  |
| 3.63654490E-01                | -2.72869010E+00 | -8.69578717E-01 | 1.88535755E+00  | 2.70997220E+00  |    |  |
| 1.58343530E+00                | 3.11913728E+00  | -2.35493330E+00 | 3.62320524E+00  | 7.88559943E-03  |    |  |
| 2.05427539E+00                | 2.00257251E+00  | -1.66232944E+00 | -3.22495835E+00 | 2.52314944E+00  |    |  |
| -5.90394405E+00               | -1.67006346E+00 | 5.35404366E+00  | -4.25561058E+00 | -8.88377803E-01 |    |  |
| -1.40119680E+00               | 5.90554155E+00  | 7.21719512E-01  | 4.57680878E+00  | 4.79736189E+00  |    |  |
| 5.81618238E-01                | 5.63898449E+00  | 9.92812894E-01  | -2.76560479E+00 | 1.29349864E+00  |    |  |
| -4.52463883E+00               | 2.45625597E+00  | -7.72173191E+00 | -2.50679695E+00 | -5.87326437E-01 |    |  |
| -9.98961888E+00               | -1.79264652E+00 | 1.30098869E+00  | -8.16965459E+00 | 4.50817541E-02  |    |  |
| -2.93714367E-01               |                 |                 |                 |                 |    |  |

*ts for alpha glucose with water bridging O1 and O2*

E(RBPW91) = -763.279407647 Hartrees

| Atomic numbers |   |   | I | N= | 27 |   |
|----------------|---|---|---|----|----|---|
| 6              | 6 | 6 | 6 | 6  | 6  | 6 |
| 8              | 8 | 8 | 8 | 8  | 8  | 8 |
| 8              | 1 | 1 | 1 | 1  | 1  | 1 |
| 1              | 1 | 1 | 1 | 1  | 1  | 1 |
| 1              | 1 | 1 |   |    |    |   |

  

| Current cartesian coordinates |                 |                 | R               | N=              | 81 |  |
|-------------------------------|-----------------|-----------------|-----------------|-----------------|----|--|
| 1.34931771E+00                | -2.41354007E+00 | -8.97409741E-01 | 1.95046004E+00  | 3.16784362E-01  |    |  |
| -1.78157120E+00               | 8.20201014E-01  | 2.20495489E+00  | 4.91047034E-02  | -2.01884709E+00 |    |  |
| 1.81281018E+00                | 3.02249180E-01  | -2.56668969E+00 | -9.58223655E-01 | 9.41157193E-01  |    |  |
| -5.37164273E+00               | -1.59069197E+00 | 7.99663677E-01  | 2.39506447E+00  | -3.05915678E+00 |    |  |
| 1.33785370E+00                | 4.64892175E+00  | 7.31430695E-01  | -1.98025598E+00 | 1.44996789E+00  |    |  |
| 4.65871406E+00                | -8.17247864E-01 | -3.01871277E+00 | 3.55843768E+00  | 2.08699042E+00  |    |  |
| -1.38372193E+00               | -2.53033160E+00 | -8.85972677E-01 | -6.28990692E+00 | -1.34070909E+00 |    |  |
| -1.69120380E+00               | 6.38361185E+00  | -1.55002848E+00 | 1.91931853E+00  | 1.83686072E+00  |    |  |
| -3.73756450E+00               | -2.43536785E+00 | 1.12702632E+00  | 6.10170469E-01  | -3.66051554E+00 |    |  |
| 1.66317512E+00                | 1.87984023E+00  | 1.93460464E+00  | -2.94765526E+00 | 2.26042294E+00  |    |  |
| -1.49214999E+00               | -1.82879998E+00 | -1.39813458E+00 | 2.84011706E+00  | -5.65245000E+00 |    |  |
| -3.51869239E+00               | 1.52871003E+00  | -6.44366479E+00 | -2.81002349E-01 | 1.98801877E+00  |    |  |
| 4.84094299E+00                | 2.53802999E+00  | -2.21746986E+00 | 3.90814865E-01  | 5.81721447E+00  |    |  |
| 1.18683014E-01                | -2.47314566E+00 | 3.02022116E+00  | 3.74500889E+00  | -5.12725732E+00 |    |  |
| -2.30664550E+00               | -2.71895579E+00 | 5.41822454E+00  | -3.13364244E+00 | 1.21634866E+00  |    |  |
| 6.20776542E+00                | -4.40337024E-01 | 3.57883953E-01  | 4.52957271E+00  | -1.28929496E+00 |    |  |
| 2.56006262E+00                |                 |                 |                 |                 |    |  |

*ts for beta glucose with water bridging O1 and O2*

E(RBPW91) = -763.277702442 Hartrees

| Atomic numbers |   |   | I | N= | 27 |   |
|----------------|---|---|---|----|----|---|
| 6              | 6 | 6 | 6 | 6  | 6  | 6 |
| 8              | 8 | 8 | 8 | 8  | 8  | 8 |
| 8              | 1 | 1 | 1 | 1  | 1  | 1 |
| 1              | 1 | 1 | 1 | 1  | 1  | 1 |
| 1              | 1 | 1 |   |    |    |   |

  

| Current cartesian coordinates |                 |                 | R               | N=              | 81 |  |
|-------------------------------|-----------------|-----------------|-----------------|-----------------|----|--|
| -1.78700355E+00               | -1.50447692E+00 | -1.12177755E+00 | -1.99336269E+00 | 9.94440947E-01  |    |  |
| 3.75109669E-01                | 1.41603895E-01  | 2.75679871E+00  | -3.33313146E-01 | 2.68372927E+00  |    |  |
| 1.50514403E+00                | 1.55457922E-01  | 2.76938957E+00  | -1.09223829E+00 | -1.13205474E+00 |    |  |
| 5.06637640E+00                | -2.63705602E+00 | -3.28697044E-01 | -3.60601696E+00 | -3.20067564E+00 |    |  |
| -6.05361655E-01               | -4.37059797E+00 | 2.21607944E+00  | -1.22161902E-01 | -1.68040006E-01 |    |  |
| 5.02618738E+00                | 1.05175729E+00  | 4.67477041E+00  | 3.14415708E+00  | -6.00728114E-01 |    |  |
| 6.40194264E-01                | -2.54973910E+00 | -4.22218503E-01 | 4.93047478E+00  | -3.27023608E+00 |    |  |
| 2.25440867E+00                | -7.33137384E+00 | -1.60843984E+00 | 7.07187459E-01  | -1.68580216E+00 |    |  |
| -1.03991761E+00               | -3.17134766E+00 | -1.85626336E+00 | 5.20111768E-01  | 2.39573445E+00  |    |  |
| -1.24910772E-02               | 3.14903614E+00  | -2.38342733E+00 | 2.93797303E+00  | 1.22271954E+00  |    |  |
| 2.18921771E+00                | 2.80899283E+00  | -8.13485615E-01 | -3.20829830E+00 | 5.17870543E+00  |    |  |
| -4.33182143E+00               | -1.53002312E+00 | 6.78625749E+00  | -1.52303894E+00 | -6.06453837E-01 |    |  |
| -4.19393274E+00               | 3.92827517E+00  | 5.00436811E-01  | 1.39222582E+00  | 5.95914055E+00  |    |  |
| 8.67419833E-01                | 4.65240106E+00  | 3.23703397E+00  | -2.42493726E+00 | 3.27703237E+00  |    |  |
| -4.02000041E+00               | 2.47259165E+00  | -6.32364569E+00 | -2.24672700E+00 | -9.21336558E-01 |    |  |
| -6.78308727E+00               | 1.99311129E-01  | 6.55111744E-01  | -5.61804854E+00 | -2.43497793E+00 |    |  |
| 1.37389523E+00                |                 |                 |                 |                 |    |  |

**Gaussian job files**

To generate alpha ts with water bridging OH1 and O5

```
%Chk=alpha1w
```

```
# b3pw91/6-31G** opt=(qst2) test
```

```
substrate here
```

```
0 1
C
C,1,R2
C,2,R3,1,A3
C,3,R4,2,A4,1,D4,0
C,4,R5,3,A5,2,D5,0
C,5,R6,4,A6,3,D6,0
O,1,R7,2,A7,3,D7,0
O,2,R8,1,A8,3,D8,0
O,3,R9,2,A9,4,D9,0
O,4,R10,3,A10,5,D10,0
O,1,R11,2,A11,7,D11,0
O,6,R12,5,A12,4,D12,0
H,1,R13,2,A13,7,D13,0
H,2,R14,1,A14,3,D14,0
H,3,R15,2,A15,4,D15,0
H,4,R16,3,A16,5,D16,0
H,5,R17,4,A17,6,D17,0
H,6,R18,5,A18,12,D18,0
H,6,R19,5,A19,12,D19,0
H,8,R20,2,A20,1,D20,0
H,9,R21,3,A21,2,D21,0
H,10,R22,4,A22,3,D22,0
H,12,R23,6,A23,5,D23,0
H,11,R26,5,A26,17,D26,0
O,17,R25,5,A25,4,D25,0
H,7,R24,1,A24,2,D24,0
H,25,R27,17,A27,24,D27,0
```

```
Variables:
```

```
R2=1.5393687
R3=1.52964636
R4=1.52924851
R5=1.53738154
R6=1.53494918
R7=1.42178937
R8=1.43726685
R9=1.4368121
R10=1.43341341
R11=1.42403406
R12=1.42372013
R13=1.09486529
R14=1.09583986
R15=1.09697128
R16=1.09763245
R17=1.09841522
R18=1.09553503
R19=1.09463693
R20=0.97971118
R21=0.97852542
```

R22=0.981265  
R23=0.981697  
R24=0.98685815  
R25=4.02881893  
R26=3.2837  
R27=0.97209722  
A3=110.19937448  
A4=110.19755194  
A5=109.54685939  
A6=110.96586677  
A7=108.71641185  
A8=111.32781477  
A9=110.33741301  
A10=109.72054365  
A11=112.08047248  
A12=112.37270549  
A13=109.03894258  
A14=110.20578784  
A15=111.20578226  
A16=109.08235441  
A17=109.45062172  
A18=110.11208562  
A19=110.89560202  
A20=105.23397672  
A21=105.22429377  
A22=104.63673953  
A23=106.77337984  
A24=104.34132674  
A25=98.12031702  
A26=116.5669  
A27=148.45505954  
D4=-52.69856293  
D5=54.85661949  
D6=-178.35150386  
D7=-69.08655886  
D8=120.28133947  
D9=-120.13260855  
D10=122.63327311  
D11=122.74345189  
D12=-66.65819506  
D13=-116.92265772  
D14=-120.6415399  
D15=123.0014281  
D16=-120.61625431  
D17=-118.13542231  
D18=-120.4175356  
D19=121.93195121  
D20=-38.29844489  
D21=-45.40669081  
D22=44.27453449  
D23=41.68445672  
D24=-164.1356796  
D25=-135.33982452  
D26=36.6177  
D27=-94.65338531

product here

```

0    1
C    1.896  -1.455   0.177
C    1.435  -0.591   1.341
C   -0.088  -0.430   1.473
C   -0.716   0.776   0.737
C   -0.587   0.737  -0.796
C   -1.483   1.776  -1.489
O    1.153  -2.105  -0.556
O    1.921  -1.259   2.527
O   -0.429  -0.247   2.878
O   -2.108   0.825   1.119
O    0.772   0.982  -1.164
O   -2.866   1.475  -1.340
H    2.989  -1.476   0.024
H    1.935   0.380   1.290
H   -0.605  -1.352   1.182
H   -0.261   1.697   1.122
H   -0.884  -0.261  -1.141
H   -1.260   1.811  -2.561
H   -1.294   2.780  -1.094
H    1.484  -2.133   2.565
H    0.393  -0.405   3.388
H   -2.101   0.624   2.082
H   -2.997   1.300  -0.381
H    0.882   0.580  -2.060
O    0.996  -0.937  -3.090
H    0.983  -1.597  -2.363
H    0.835  -1.493  -3.871

```

*To generate beta ts with water bridging OH1 and O5*

```
%Chk=beta1w
```

```
# b3pw91/6-31G** opt=(qst2) test
```

```
substrate here
```

```

0    1
C
C,1,R2
C,2,R3,1,A3
C,3,R4,2,A4,1,D4,0
C,4,R5,3,A5,2,D5,0
C,5,R6,4,A6,3,D6,0
O,1,R7,2,A7,3,D7,0
O,2,R8,1,A8,3,D8,0
O,3,R9,2,A9,4,D9,0
O,4,R10,3,A10,5,D10,0
O,1,R11,2,A11,7,D11,0
O,6,R12,5,A12,4,D12,0
H,1,R13,2,A13,7,D13,0
H,2,R14,1,A14,3,D14,0
H,3,R15,2,A15,4,D15,0
H,4,R16,3,A16,5,D16,0
H,5,R17,4,A17,6,D17,0

```

H,6,R18,5,A18,12,D18,0  
H,6,R19,5,A19,12,D19,0  
H,8,R20,2,A20,1,D20,0  
H,9,R21,3,A21,2,D21,0  
H,10,R22,4,A22,3,D22,0  
H,12,R23,6,A23,5,D23,0  
H,11,R26,5,A26,17,D26,0  
O,11,R25,5,A25,4,D25,0  
H,7,R24,1,A24,2,D24,0  
H,25,R27,26,A27,24,D27,0

Variables:

R2=1.53693103  
R3=1.52478654  
R4=1.52972089  
R5=1.53874852  
R6=1.53451263  
R7=1.42097783  
R8=1.4360087  
R9=1.43658414  
R10=1.43208834  
R11=1.42292937  
R12=1.42325859  
R13=1.09715769  
R14=1.09723698  
R15=1.09723698  
R16=1.09749989  
R17=1.09848851  
R18=1.09509726  
R19=1.09609261  
R20=0.98068802  
R21=0.97975558  
R22=0.98126908  
R23=0.98173011  
R24=0.98426165  
R25=3.2666  
R26=2.9365  
R27=0.97369656  
A3=109.46575119  
A4=110.19386759  
A5=109.54552622  
A6=111.0135213  
A7=107.49560135  
A8=111.45683686  
A9=110.63570017  
A10=109.61565274  
A11=111.04960252  
A12=112.05346135  
A13=110.99239357  
A14=110.53171024  
A15=110.78243581  
A16=109.17344617  
A17=109.45498791  
A18=110.21427477  
A19=110.96649284  
A20=104.69262417  
A21=105.00998187  
A22=104.8280151

A23=106.83793962  
 A24=104.23835842  
 A25=132.6627  
 A26=125.8592  
 A27=146.36072708  
 D4=-53.69666457  
 D5=53.92195465  
 D6=-178.16531924  
 D7=176.25290419  
 D8=120.80961622  
 D9=-120.54503038  
 D10=122.33642621  
 D11=-119.10841239  
 D12=-67.62966761  
 D13=117.40132891  
 D14=-121.15565412  
 D15=122.63508432  
 D16=-120.80370772  
 D17=-118.45672702  
 D18=-120.27205175  
 D19=121.82704871  
 D20=50.60826187  
 D21=-46.52253789  
 D22=46.02616155  
 D23=44.0756151  
 D24=170.70915389  
 D25=151.5864  
 D26=51.3561  
 D27=146.66614584

product here

|   | 0      | 1      |        |
|---|--------|--------|--------|
| C | -1.496 | 1.668  | -0.009 |
| C | -1.330 | 0.737  | 1.181  |
| C | 0.154  | 0.522  | 1.519  |
| C | 0.843  | -0.686 | 0.847  |
| C | 0.777  | -0.680 | -0.691 |
| C | 1.728  | -1.705 | -1.326 |
| O | -2.399 | 1.566  | -0.840 |
| O | -1.941 | 1.422  | 2.295  |
| O | 0.301  | 0.330  | 2.949  |
| O | 2.212  | -0.697 | 1.298  |
| O | -0.563 | -0.974 | -1.080 |
| O | 3.092  | -1.352 | -1.130 |
| H | -0.794 | 2.519  | -0.057 |
| H | -1.865 | -0.205 | 1.033  |
| H | 0.732  | 1.429  | 1.303  |
| H | 0.386  | -1.608 | 1.230  |
| H | 1.045  | 0.320  | -1.053 |
| H | 1.547  | -1.771 | -2.404 |
| H | 1.557  | -2.706 | -0.914 |
| H | -2.900 | 1.441  | 2.109  |
| H | -0.429 | 0.851  | 3.349  |
| H | 2.148  | -0.554 | 2.268  |
| H | 3.187  | -1.179 | -0.167 |
| H | -0.668 | -0.691 | -2.020 |

```
O   -1.434   0.443  -3.180
H   -2.011   0.867  -2.506
H   -1.879   0.693  -4.006
```

*To generate alpha ts with water hydrogen bonded only to OH1*

```
%chk=a1
```

```
#b3pw91/6-31g** opt(qst3,addredundant) iop(2/15=3) test
```

```
alsub
```

```
0 1
C   -3.797   0.331   0.050
C   -4.857   0.213   1.1450
C   -6.113  -0.399   0.5470
C   -6.593   0.424  -0.6420
C   -5.460   0.642  -1.6520
C   -5.812   1.681  -2.7080
O   -3.460  -0.938  -0.3990
O   -4.351  -0.554   2.2120
O   -7.090  -0.460   1.5710
O   -7.737  -0.186  -1.2330
O   -4.299   1.156  -0.9930
O   -5.998   2.957  -2.1360
O   -1.150  -2.374  -0.4190
H   -2.923   0.873   0.4320
H   -5.099   1.237   1.4740
H   -5.857  -1.414   0.1970
H   -6.934   1.403  -0.2910
H   -5.215  -0.316  -2.1380
H   -5.018   1.692  -3.4710
H   -6.751   1.400  -3.1930
H   -5.111  -0.744   2.7780
H   -7.926  -0.666   1.1330
H   -7.450  -1.028  -1.6110
H   -5.207   3.116  -1.6030
H   -2.534  -0.994  -0.6830
H   -0.464  -2.131   0.2130
H   -1.852  -2.751   0.1270
```

```
1 7 13 F
```

```
2 1 7 13 F
```

```
alion
```

```
0 1
C           -2.612   1.925  -2.000
C           -4.090   1.691  -2.316
C           -4.377   2.200  -3.719
C           -3.979   3.665  -3.846
C           -2.533   3.883  -3.384
C           -2.186   5.358  -3.232
O           -1.834   1.179  -2.874
O           -4.392   0.322  -2.177
O           -5.758   2.008  -3.970
```

|   |        |        |        |
|---|--------|--------|--------|
| O | -4.198 | 4.120  | -5.178 |
| O | -2.336 | 3.316  | -2.086 |
| O | -2.955 | 5.969  | -2.219 |
| O | -0.030 | -0.829 | -2.539 |
| H | -2.408 | 1.669  | -0.953 |
| H | -4.674 | 2.300  | -1.605 |
| H | -3.770 | 1.604  | -4.422 |
| H | -4.637 | 4.275  | -3.219 |
| H | -1.845 | 3.410  | -4.103 |
| H | -1.108 | 5.448  | -3.030 |
| H | -2.406 | 5.880  | -4.168 |
| H | -5.273 | 0.211  | -2.559 |
| H | -5.957 | 2.505  | -4.774 |
| H | -3.581 | 3.643  | -5.749 |
| H | -2.847 | 5.405  | -1.441 |
| H | 0.591  | -0.172 | -2.886 |
| H | -0.079 | -1.347 | -1.727 |
| H | -0.824 | -1.081 | -3.028 |

1 7 13 F  
2 1 7 13 F

alts

|   |   |        |        |        |
|---|---|--------|--------|--------|
| 0 | 1 |        |        |        |
| C |   | -1.187 | 1.892  | -3.089 |
| C |   | -2.397 | 1.759  | -4.013 |
| C |   | -1.973 | 2.111  | -5.430 |
| C |   | -1.358 | 3.504  | -5.471 |
| C |   | -0.242 | 3.643  | -4.429 |
| C |   | 0.207  | 5.087  | -4.245 |
| O |   | -0.220 | 0.972  | -3.467 |
| O |   | -2.918 | 0.453  | -3.926 |
| O |   | -3.119 | 2.018  | -6.257 |
| O |   | -0.911 | 3.806  | -6.790 |
| O |   | -0.709 | 3.229  | -3.142 |
| O |   | -0.832 | 5.889  | -3.729 |
| O |   | 0.960  | -1.137 | -2.218 |
| H |   | -1.496 | 1.752  | -2.046 |
| H |   | -3.140 | 2.503  | -3.684 |
| H |   | -1.211 | 1.376  | -5.743 |
| H |   | -2.131 | 4.247  | -5.249 |
| H |   | 0.616  | 3.021  | -4.729 |
| H |   | 1.092  | 5.100  | -3.590 |
| H |   | 0.491  | 5.504  | -5.215 |
| H |   | -3.551 | 0.377  | -4.652 |
| H |   | -2.877 | 2.426  | -7.098 |
| H |   | -0.181 | 3.204  | -6.989 |
| H |   | -1.152 | 5.421  | -2.946 |
| H |   | 0.598  | 0.371  | -2.305 |
| H |   | 0.492  | -1.541 | -1.478 |
| H |   | 0.430  | -1.374 | -2.990 |

1 7 13 F  
2 1 7 13 F  
7 13 F

To generate beta ts with water hydrogen bonded only to OH1

%chk=b1

#b3pw91/6-31g\*\* opt(qst3,addredundant) iop(2/15=3) test

b1sub

|   |   |        |        |         |
|---|---|--------|--------|---------|
| 0 | 1 |        |        |         |
| C |   | -3.833 | 0.343  | -0.3040 |
| C |   | -4.606 | 0.579  | 0.9890  |
| C |   | -5.964 | -0.098 | 0.8870  |
| C |   | -6.726 | 0.348  | -0.3510 |
| C |   | -5.858 | 0.152  | -1.5980 |
| C |   | -6.466 | 0.786  | -2.8440 |
| O |   | -2.665 | 1.067  | -0.2700 |
| O |   | -3.865 | 0.056  | 2.0680  |
| O |   | -6.675 | 0.179  | 2.0760  |
| O |   | -7.974 | -0.331 | -0.4310 |
| O |   | -4.604 | 0.796  | -1.4180 |
| O |   | -6.552 | 2.186  | -2.7140 |
| O |   | 0.037  | 1.214  | -0.5290 |
| H |   | -3.645 | -0.741 | -0.4220 |
| H |   | -4.755 | 1.667  | 1.0890  |
| H |   | -5.780 | -1.189 | 0.8010  |
| H |   | -6.975 | 1.411  | -0.2720 |
| H |   | -5.712 | -0.932 | -1.7710 |
| H |   | -5.862 | 0.494  | -3.7180 |
| H |   | -7.482 | 0.406  | -2.9840 |
| H |   | -4.463 | 0.067  | 2.8270  |
| H |   | -7.591 | -0.081 | 1.9100  |
| H |   | -7.788 | -1.269 | -0.5710 |
| H |   | -5.666 | 2.476  | -2.4550 |
| H |   | -1.997 | 0.718  | -0.8790 |
| H |   | -0.011 | 2.147  | -0.7640 |
| H |   | -0.359 | 1.184  | 0.3510  |

1 7 13 F

2 1 7 13 F

blion

|   |   |        |       |        |
|---|---|--------|-------|--------|
| 0 | 1 |        |       |        |
| C |   | 3.224  | 2.071 | -0.469 |
| C |   | 3.165  | 3.216 | -1.474 |
| C |   | 4.525  | 3.364 | -2.139 |
| C |   | 5.638  | 3.529 | -1.116 |
| C |   | 5.585  | 2.385 | -0.098 |
| C |   | 6.523  | 2.605 | 1.084  |
| O |   | 2.042  | 2.023 | 0.231  |
| O |   | 2.168  | 2.935 | -2.430 |
| O |   | 4.454  | 4.461 | -3.026 |
| O |   | 6.897  | 3.630 | -1.772 |
| O |   | 4.282  | 2.300 | 0.463  |
| O |   | 6.144  | 3.737 | 1.832  |
| O |   | -0.107 | 0.638 | 1.156  |

|   |        |        |        |
|---|--------|--------|--------|
| H | 3.426  | 1.125  | -1.006 |
| H | 2.939  | 4.136  | -0.911 |
| H | 4.716  | 2.430  | -2.706 |
| H | 5.512  | 4.472  | -0.576 |
| H | 5.848  | 1.436  | -0.604 |
| H | 6.532  | 1.693  | 1.700  |
| H | 7.537  | 2.782  | 0.713  |
| H | 2.288  | 3.586  | -3.134 |
| H | 5.364  | 4.663  | -3.280 |
| H | 7.070  | 2.783  | -2.203 |
| H | 5.204  | 3.614  | 2.028  |
| H | 0.066  | -0.236 | 1.078  |
| H | -0.209 | 1.244  | 1.898  |
| H | -0.202 | 1.210  | 0.385  |

1 7 13 F  
2 1 7 13 F

blts

|   |   |        |       |        |
|---|---|--------|-------|--------|
| 0 | 1 |        |       |        |
| C |   | -1.453 | 2.102 | -2.894 |
| C |   | -2.571 | 3.077 | -2.540 |
| C |   | -3.533 | 3.177 | -3.714 |
| C |   | -2.814 | 3.539 | -5.004 |
| C |   | -1.660 | 2.563 | -5.251 |
| C |   | -0.757 | 2.997 | -6.400 |
| O |   | -0.511 | 2.114 | -1.893 |
| O |   | -3.235 | 2.614 | -1.386 |
| O |   | -4.528 | 4.122 | -3.377 |
| O |   | -3.740 | 3.589 | -6.084 |
| O |   | -0.819 | 2.512 | -4.106 |
| O |   | -0.109 | 4.214 | -6.108 |
| O |   | 1.050  | 0.802 | -0.096 |
| H |   | -1.884 | 1.094 | -3.044 |
| H |   | -2.106 | 4.063 | -2.373 |
| H |   | -3.992 | 2.175 | -3.847 |
| H |   | -2.398 | 4.548 | -4.928 |
| H |   | -2.074 | 1.559 | -5.468 |
| H |   | -0.036 | 2.190 | -6.605 |
| H |   | -1.363 | 3.155 | -7.296 |
| H |   | -4.031 | 3.155 | -1.306 |
| H |   | -5.002 | 4.319 | -4.196 |
| H |   | -4.076 | 2.693 | -6.223 |
| H |   | 0.304  | 4.085 | -5.242 |
| H |   | 0.236  | 0.726 | -1.458 |
| H |   | 1.704  | 1.509 | -0.109 |
| H |   | 0.246  | 1.246 | 0.202  |

1 7 13 F  
2 1 7 13 F  
7 13 F

*To generate alpha ts with water bridging OH1 and OH2*

%chk=a12

```
#b3pw91/6-31g** opt=qst3 iop(2/15=3) test
```

```
a12
```

| 0 | 1 |        |        |        |
|---|---|--------|--------|--------|
| C |   | 1.715  | 0.237  | 0.753  |
| C |   | 0.318  | 0.131  | 1.390  |
| C |   | -0.719 | 0.075  | 0.286  |
| C |   | -0.601 | 1.299  | -0.610 |
| C |   | 0.839  | 1.462  | -1.110 |
| C |   | 1.076  | 2.811  | -1.776 |
| O |   | 2.011  | -0.846 | -0.068 |
| O |   | 0.233  | -1.020 | 2.225  |
| O |   | -1.994 | -0.020 | 0.898  |
| O |   | -1.545 | 1.223  | -1.671 |
| O |   | 1.751  | 1.422  | -0.008 |
| O |   | 0.912  | 3.875  | -0.864 |
| O |   | 2.258  | -2.843 | 1.778  |
| H |   | 2.473  | 0.373  | 1.538  |
| H |   | 0.151  | 1.035  | 1.994  |
| H |   | -0.512 | -0.824 | -0.318 |
| H |   | -0.871 | 2.196  | -0.042 |
| H |   | 1.078  | 0.651  | -1.816 |
| H |   | 2.081  | 2.812  | -2.224 |
| H |   | 0.342  | 2.950  | -2.575 |
| H |   | -0.709 | -1.150 | 2.399  |
| H |   | -2.642 | 0.147  | 0.201  |
| H |   | -1.275 | 0.494  | -2.247 |
| H |   | 1.494  | 3.669  | -0.121 |
| H |   | 2.254  | -1.610 | 0.504  |
| H |   | 1.477  | -2.379 | 2.137  |
| H |   | 1.913  | -3.658 | 1.399  |

```
a12ion
```

| 0 | 1 |        |        |        |
|---|---|--------|--------|--------|
| C |   | 1.564  | -0.587 | 0.880  |
| C |   | 0.303  | 0.132  | 1.393  |
| C |   | -0.580 | 0.474  | 0.210  |
| C |   | 0.187  | 1.327  | -0.790 |
| C |   | 1.510  | 0.653  | -1.169 |
| C |   | 2.437  | 1.582  | -1.942 |
| O |   | 1.268  | -1.765 | 0.203  |
| O |   | -0.395 | -0.685 | 2.328  |
| O |   | -1.730 | 1.135  | 0.708  |
| O |   | -0.629 | 1.610  | -1.920 |
| O |   | 2.236  | 0.295  | 0.011  |
| O |   | 2.833  | 2.688  | -1.160 |
| O |   | 0.382  | -3.334 | 2.254  |
| H |   | 2.260  | -0.759 | 1.714  |
| H |   | 0.620  | 1.063  | 1.886  |
| H |   | -0.860 | -0.474 | -0.280 |
| H |   | 0.413  | 2.300  | -0.342 |
| H |   | 1.306  | -0.250 | -1.765 |
| H |   | 3.305  | 1.003  | -2.293 |
| H |   | 1.907  | 1.972  | -2.815 |

|   |        |        |        |
|---|--------|--------|--------|
| H | -1.269 | -0.285 | 2.427  |
| H | -2.176 | 1.518  | -0.059 |
| H | -0.767 | 0.777  | -2.393 |
| H | 3.200  | 2.312  | -0.350 |
| H | 1.366  | -3.448 | 2.107  |
| H | -0.048 | -2.489 | 2.492  |
| H | -0.329 | -3.895 | 1.929  |

a12ts

|   |   |        |        |        |
|---|---|--------|--------|--------|
| 0 | 1 |        |        |        |
| C |   | -0.120 | -0.828 | 1.693  |
| C |   | -1.053 | 0.152  | 0.958  |
| C |   | -0.385 | 0.589  | -0.330 |
| C |   | 0.969  | 1.217  | -0.035 |
| C |   | 1.821  | 0.277  | 0.825  |
| C |   | 3.064  | 0.960  | 1.380  |
| O |   | 0.161  | -1.963 | 0.940  |
| O |   | -2.313 | -0.458 | 0.696  |
| O |   | -1.262 | 1.490  | -0.984 |
| O |   | 1.613  | 1.586  | -1.248 |
| O |   | 1.081  | -0.147 | 1.974  |
| O |   | 2.729  | 2.011  | 2.259  |
| O |   | -2.270 | -3.207 | 0.952  |
| H |   | -0.546 | -1.083 | 2.674  |
| H |   | -1.198 | 1.030  | 1.604  |
| H |   | -0.228 | -0.313 | -0.945 |
| H |   | 0.826  | 2.152  | 0.517  |
| H |   | 2.114  | -0.603 | 0.230  |
| H |   | 3.692  | 0.203  | 1.873  |
| H |   | 3.633  | 1.395  | 0.553  |
| H |   | -2.751 | 0.111  | 0.047  |
| H |   | -0.747 | 1.907  | -1.687 |
| H |   | 1.839  | 0.770  | -1.715 |
| H |   | 2.140  | 1.619  | 2.917  |
| H |   | -0.839 | -2.786 | 1.579  |
| H |   | -2.556 | -2.282 | 0.817  |
| H |   | -2.400 | -3.636 | 0.100  |

To generate beta ts with water bridging OH1 and OH2

```
%chk=b12
```

```
#b3pw91/6-31g** opt=qst3 iop(2/15=3) test
```

```
b12sub
```

|   |   |        |        |        |
|---|---|--------|--------|--------|
| 0 | 1 |        |        |        |
| C |   | 1.095  | -0.093 | -0.910 |
| C |   | 0.471  | -0.238 | 0.485  |
| C |   | -0.933 | -0.796 | 0.361  |
| C |   | -1.781 | 0.071  | -0.555 |
| C |   | -1.067 | 0.256  | -1.899 |
| C |   | -1.739 | 1.304  | -2.780 |
| O |   | 2.314  | 0.548  | -0.888 |
| O |   | 1.268  | -1.112 | 1.277  |

|   |        |        |        |
|---|--------|--------|--------|
| O | -1.477 | -0.904 | 1.661  |
| O | -3.084 | -0.483 | -0.688 |
| O | 0.254  | 0.733  | -1.694 |
| O | -1.674 | 2.582  | -2.190 |
| O | 3.881  | -1.301 | 0.393  |
| H | 1.163  | -1.099 | -1.374 |
| H | 0.434  | 0.765  | 0.935  |
| H | -0.852 | -1.802 | -0.099 |
| H | -1.926 | 1.059  | -0.105 |
| H | -1.046 | -0.715 | -2.432 |
| H | -1.263 | 1.288  | -3.772 |
| H | -2.797 | 1.052  | -2.899 |
| H | 0.738  | -1.340 | 2.052  |
| H | -2.425 | -1.058 | 1.547  |
| H | -3.002 | -1.316 | -1.171 |
| H | -0.738 | 2.732  | -1.999 |
| H | 2.993  | -0.097 | -0.590 |
| H | 3.058  | -1.406 | 0.908  |
| H | 4.459  | -0.778 | 0.958  |

b12ion

|   |   |        |        |        |
|---|---|--------|--------|--------|
| 0 | 1 |        |        |        |
| C |   | 1.079  | -0.085 | 0.929  |
| C |   | -0.216 | -0.615 | 0.298  |
| C |   | -0.179 | -0.398 | -1.202 |
| C |   | 0.057  | 1.067  | -1.531 |
| C |   | 1.310  | 1.565  | -0.802 |
| C |   | 1.477  | 3.079  | -0.891 |
| O |   | 1.054  | -0.111 | 2.306  |
| O |   | -0.352 | -2.004 | 0.580  |
| O |   | -1.389 | -0.887 | -1.744 |
| O |   | 0.123  | 1.249  | -2.940 |
| O |   | 1.219  | 1.281  | 0.586  |
| O |   | 0.423  | 3.746  | -0.235 |
| O |   | 1.084  | -2.807 | 2.802  |
| H |   | 1.935  | -0.660 | 0.518  |
| H |   | -1.051 | -0.048 | 0.735  |
| H |   | 0.676  | -0.980 | -1.600 |
| H |   | -0.796 | 1.667  | -1.196 |
| H |   | 2.200  | 1.070  | -1.237 |
| H |   | 2.456  | 3.351  | -0.470 |
| H |   | 1.454  | 3.384  | -1.941 |
| H |   | -1.048 | -2.335 | -0.002 |
| H |   | -1.434 | -0.555 | -2.651 |
| H |   | 0.924  | 0.810  | -3.257 |
| H |   | 0.400  | 3.378  | 0.659  |
| H |   | 2.085  | -2.830 | 2.823  |
| H |   | 0.497  | -2.796 | 2.022  |
| H |   | 0.493  | -2.922 | 3.553  |

b12ts

|   |   |        |        |        |
|---|---|--------|--------|--------|
| 0 | 1 |        |        |        |
| C |   | 1.089  | 0.013  | 0.922  |
| C |   | -0.206 | -0.587 | 0.357  |
| C |   | -0.186 | -0.511 | -1.157 |

|   |        |        |        |
|---|--------|--------|--------|
| C | 0.031  | 0.919  | -1.625 |
| C | 1.285  | 1.496  | -0.959 |
| C | 1.434  | 2.996  | -1.191 |
| O | 1.078  | 0.116  | 2.295  |
| O | -0.324 | -1.944 | 0.769  |
| O | -1.396 | -1.060 | -1.639 |
| O | 0.081  | 0.969  | -3.045 |
| O | 1.211  | 1.343  | 0.450  |
| O | 0.379  | 3.711  | -0.589 |
| O | 1.142  | -2.522 | 3.041  |
| H | 1.947  | -0.589 | 0.557  |
| H | -1.043 | 0.010  | 0.748  |
| H | 0.672  | -1.119 | -1.510 |
| H | -0.825 | 1.539  | -1.338 |
| H | 2.177  | 0.972  | -1.355 |
| H | 2.415  | 3.317  | -0.807 |
| H | 1.398  | 3.202  | -2.265 |
| H | -1.023 | -2.335 | 0.228  |
| H | -1.453 | -0.815 | -2.572 |
| H | 0.883  | 0.511  | -3.328 |
| H | 0.369  | 3.429  | 0.336  |
| H | 1.594  | -1.256 | 2.670  |
| H | 0.547  | -2.589 | 2.270  |
| H | 0.560  | -2.571 | 3.806  |

## Full Reference

(23) Frisch, M. J.; Trucks, G. W.; Schlegel, H. B.; Scuseria, G. E.; Robb, M. A.; Cheeseman, J. R.; Zakrzewski, V. G.; Montgomery, J. A.; Stratmann, R. E.; Burant, J. C.; Dapprich, S.; Millam, J. M.; Daniels, A. D.; Kudin, K. N.; Strain, M. C.; Farkas, O.; Tomasi, J.; Barone, V.; Cossi, M.; Cammi, R.; Mennucci, B.; Pomelli, C.; Adamo, C.; Clifford, S.; Ochterski, J.; Petersson, G. A.; Ayala, P. Y.; Cui, Q.; Morokuma, K.; Malick, D. K.; Rabuck, A. D.; Raghavachari, K.; Foresman, J. B.; Cioslowski, J.; Ortiz, J. V.; Stefanov, B. B.; Liu, G.; Liashenko, A.; Piskorz, P.; Komaromi, I.; Gomperts, R.; Martin, R. L.; Fox, D. J.; Keith, T.; Al-Laham, M. A.; Peng, C. Y.; Nanayakkara, A.; Gonzalez, C.; Challacombe, M.; Gill, P. M. W.; Johnson, B. G.; Chen, W.; Wong, M. W.; Andres, J. L.; Head-Gordon, M.; Replogle, E. S.; Pople, J. A. *Gaussian 94, Revisions C.2, D.4, Gaussian 98, Revision A.6*; Gaussian, Inc.: Pittsburgh, PA, 1998.
